# The response of a metapopulation to a changing environment

Nick Barton<sup>1,§</sup>, Oluwafunmilola Olusanya<sup>1</sup>

<sup>1</sup>*Institute of Science and Technology Austria, Am Campus 1, Klosterneuburg 3400, Austria.*

§ Corresponding author

## Abstract

A species that is distributed across heterogeneous environments may adapt to local conditions. Szep et al (Evolution, 2021) modelled this process in the infinite island model, finding the stationary distribution of allele frequencies and deme sizes. We extend this to ask how a metapopulation responds to changes in carrying capacity, selection strength, or migration rate, restricting attention to fixed deme size (“soft selection”). We develop a “fixed-state” approximation (accurate when migration is rare) which assumes that the loci are near fixation. Under this approximation, polymorphism is only possible for a narrow range of habitat proportions when selection is weak compared to drift, but for a much wider range otherwise. When local conditions ( $Ns$  or  $Nm$ ) change in a single deme of the metapopulation, it takes the population a time of order  $1/m$  to reach the new equilibrium. However, even with many loci, there can be substantial fluctuations in net adaptation, due to the bimodal allele frequency distributions at each locus. Thus, in a finite metapopulation, variation may gradually be lost by chance, even if it would persist if there were infinitely many demes. When conditions change across the whole metapopulation, there can be rapid change, which is predicted well by the fixed-state approximation when  $Nm \ll 1$ .

*Keywords:* metapopulation, local adaptation, species’ range, diffusion, adaptive walk, changing conditions, soft selection.

## Introduction

Species must adapt to varied environments, whilst drawing on a common pool of genetic variation. Thus, there is a tension between selection that favours different alleles in different places, and the maintenance of diversity across the whole species. Local populations can only sustain themselves if they are sufficiently well-adapted; conversely, adaptation to conditions beyond the current niche can extend the range of the species.

These issues, which lie at the interface between ecology and evolution, have only quite recently attracted sustained theoretical attention. This ranges from studies of “evolutionary rescue”, typically of a single isolated deme [5, 6, 18], through to analyses of limits to a species’ range in one or two spatial dimensions [9, 11, 14]. Here, we consider an idealised metapopulation; in this island model, there is no explicit spatial structure. Nevertheless, we can ask whether the species’ range can extend over a variety of habitats, and examine how it responds dynamically to changing conditions – either in a single deme, or across the whole metapopulation.

This paper is an extension of [16], which analysed the joint evolution of allele frequencies and deme sizes, in an island model with explicit density-dependent regulation; a diffusion approximation gave explicit formulae for the stationary distribution of an infinite metapopulation. Here, we extend this treatment to consider the evolution of individual demes, and of the whole metapopulation, as conditions change; we also consider fluctuations in a metapopulation with

39 a limited number of demes, where variation can be lost by chance. We simplify the problem by  
40 assuming that deme sizes are fixed, independent of adaptedness (“soft selection”), but believe  
41 that the methods we introduce can be extended to allow density regulation (“hard selection”).

42 In principle, we can calculate the joint distribution of deme size and allele frequencies un-  
43 der the diffusion approximation. However, this is numerically challenging, since it involves a  
44 high dimensional partial differential equation; in any case, it can only be done for an infinite  
45 metapopulation, where the mean population size and allele frequencies across the population as  
46 a whole are fixed, even though population sizes and allele frequencies within any deme follow  
47 a distribution. In order to go beyond mere simulation, we use the approximation that loci are  
48 typically near fixation; this is accurate if the number of non-native alleles that enter per genera-  
49 tion is small. It allows us to follow the distribution of states of a finite metapopulation through  
50 time, which depends only on the rates of substitutions in either direction. This “fixed-state”  
51 approximation is an extension of models of “adaptive walks” (e.g. Orr [12], Trubenova et al  
52 [17]) to structured populations.

53 We first consider an infinite metapopulation, and determine the accuracy of the fixed-state ap-  
54 proximation. We then apply the approximation to calculate the dynamics of a finite metapopu-  
55 lation, and to find how its equilibria depend on the number of demes. (In order for a non-trivial  
56 equilibrium to exist, we must allow a low rate of mutation to maintain variation in the long  
57 term). Finally, we show how metapopulations respond to changing conditions, focusing on  
58 changes that take the system between qualitatively different regimes.

## 59 Model and Methods

60 We simulate a haploid population, assuming linkage equilibrium. Provided that selection is  
61 weak, this is accurate, and allows us to efficiently simulate large numbers of loci and demes; Szep  
62 et al (2021, SI C) examine the effects of linkage disequilibrium in this model, using individual-  
63 based simulations. We obtain analytical results by taking the diffusion limit, which also assumes  
64 weak selection, and then approximate this by assuming that demes are near fixation, which  
65 applies when there are few migrants ( $Nm < 1$ ). As is traditional in population genetics, we take  
66 the fundamental model to be the diffusion, since this captures the behaviour of a variety of  
67 particular life histories, and identifies the key dimensionless parameters.

## 68 Simulations

69 Our baseline island model assumes that demes each have carrying capacity  $N$  haploid indi-  
70 viduals, and contribute equally to the migrant pool. A deme of size  $N$  is expected to lose a  
71 fraction  $m$  of individuals by emigration, and receives a Poisson distributed number of migrants,  
72  $Nm^*$ , with expectation  $Nm$ . There are  $L$  biallelic loci, with the two alternative alleles labelled  
73  $X_{i,k} = 0$  or  $1$ ;  $i$  labels the deme, and  $k$  the locus. Deme  $i$  is described by  $\{j_{i,1}, j_{i,2}, \dots, j_{i,L}\}$ ,  
74 where  $0 \leq j_{i,k} \leq N$  is the number of copies of the ‘1’ allele at the  $k$ ’th locus. That allele is favoured  
75 by selection  $s_i$ , which we assume to be the same across loci; the marginal relative fitnesses are  
76  $1:e^{s_i}$ , and fitnesses multiply across loci. Under soft selection, loci evolve independently, and so  
77 it would be straightforward to extend to allow variation in selection across loci.

78 We assume linkage equilibrium (LE), and apply the Wright-Fisher model to each locus indepen-  
79 dently. After selection, allele frequencies are  $p_{i,k}^* = j_{i,k} / ((N - j_{i,k}) e^{-s_i} + j_{i,k})$ , and after migration,  
80  $p_{i,k}^{**} = m \bar{p}_k + (1 - m) p_{i,k}^*$  where  $\bar{p}_k$  is the frequency averaged across all demes of the metapopula-  
81 tion. The new population in deme  $i$  consists of  $N$  individuals, the number of allele copies at  
82 locus  $k$  being binomially sampled with frequency  $p_{i,k}^{**}$ . This procedure is accurate provided that

83  $s$  is not too large ( $<0.2$ , say), so that recombination shuffles genes faster than selection, drift,  
84 or migration build up associations between them (Szep et al., 2021, SI C).

85 A Mathematica notebook containing the simulation code and result is provided as a supple-  
86 mentary material.

## 87 Diffusion approximation

88 The diffusion approximation to this model describes the evolution of the joint distribution  
89 of allele frequencies across different demes, conditional on the mean allele frequency across the  
90 metapopulation [2]. A single deme follows a stochastic path governed by this distribution, whilst  
91 an infinite metapopulation represents the whole distribution, which evolves deterministically at  
92 the level of the whole metapopulation. The diffusion depends only on scaled parameters  $Ns$ ,  
93  $Nm$ .

94 Wright [19, 20] gave an explicit solution for the stationary distribution of allele frequencies:

$$\Psi[p|\bar{p}] = \frac{1}{Z} \prod_{k=1}^L p_k^{2Nm\bar{p}_k-1} q_k^{2Nm\bar{q}_k-1} e^{2Nsp_k} \quad (1)$$

95 where  $Z$  is a normalising constant. Under this simple model of directional selection, allele  
96 frequencies evolve independently across demes and across loci, conditional on the mean allele  
97 frequencies,  $\bar{p}_k$ . Equation (1) applies to a single deme; the subscript  $i$  was dropped for clarity.  
98 All demes that share the same parameters will follow the same distribution, in a given habitat,  
99 and so we can integrate over the distribution, and sum over habitats, to find the mean  $\bar{p}_k$ . This  
100 allows us to solve fully for the stationary state.

## 101 Fixed-state approximation

102 If the number of incoming alleles is small ( $Nm \ll 1$ ) then the distribution of allele frequencies will  
103 be sharply peaked around 0 and 1. To a good approximation, populations are near fixation for  
104 one or other allele, and their state is determined by the rates of substitution in either direction.  
105 Since we will later be considering the stationary state of a finite metapopulation, we must  
106 include mutation, which we assume to be symmetric at rate  $\mu$ . Then, the rate at which demes  
107 currently fixed for allele 0 substitute allele 1,  $\lambda_{0 \rightarrow 1}$  (or vice versa,  $\lambda_{1 \rightarrow 0}$ ) is the product of the  
108 number of ‘1’ (or ‘0’) alleles entering the population, and their individual fixation probability.  
109 Thus:

$$\lambda_{0 \rightarrow 1} = \frac{2s(N\mu + Nm\bar{p})}{1 - e^{-2Ns}}, \quad \lambda_{1 \rightarrow 0} = \frac{2s(N\mu + Nm\bar{q})}{e^{2Ns} - 1} \quad (2)$$

110 Different loci evolve independently, conditional on the numbers of migrants coming into the  
111 deme ( $Nm\bar{p}$ ), ( $Nm\bar{q}$ ).

For an infinite metapopulation, and two habitats with selection  $s_1, s_2$ , with deme sizes fixed at  $N$  (i.e., soft selection), we can just follow the proportion of demes fixed for the ‘1’ allele in each habitat. Neglecting mutation:

$$\begin{aligned} \partial_t P_1 &= \frac{2s_1 Nm}{1 - e^{-2Ns_1}} (\bar{p}Q_1 - \bar{q}e^{-2Ns_1} P_1) \\ \partial_t P_2 &= \frac{2s_2 Nm}{1 - e^{-2Ns_2}} (\bar{p}Q_2 - \bar{q}e^{-2Ns_2} P_2) \\ \bar{p} &= \rho P_1 + (1 - \rho) P_2 \end{aligned} \quad (3)$$

112 The first two equations involve the difference in net rates of substitution in each direction. The  
 113 fraction of loci near fixation for 0, 1 are  $Q, P$ ; the fraction of migrants with allele 1 vs 0, which  
 114 can contribute to a substitution, are  $\bar{p}, \bar{q}$ ; and the fixation probabilities in each direction are in  
 115 the ratio  $1:e^{-2Ns_1}$ . Finally, the mean allele frequencies are a weighted average across habitats,  
 116 which are in the proportions  $\rho:1-\rho$ .

117 These equations apply separately to each locus, but for simplicity, in numerical examples we  
 118 will assume symmetric initial conditions, so that  $P_1, P_2$  are the same for all loci, and correspond  
 119 to the proportion of loci fixed for the ‘1’ allele in each deme.

120 If the ‘1’ allele is favoured in habitat 1, but disfavoured in habitat 2 (i.e.  $s_2 < 0 < s_1$ ), and if  
 121 neither habitat is too rare, then polymorphism is possible, with equilibrium frequency given by:

$$\bar{p} = \frac{\rho(e^{2N(s_1-s_2)}-1) - (e^{-2Ns_2}-1)}{(e^{2Ns_1}-1)(e^{-2Ns_2}-1)}, \quad \frac{e^{-2Ns_2}-1}{e^{2N(s_1-s_2)}-1} < \rho < \frac{(e^{-2Ns_2}-1)}{e^{2N(s_1-s_2)}-1} e^{2Ns_1} \quad (4)$$

122 If selection is weak relative to drift, polymorphism is possible only for a very narrow range of  
 123 habitat proportions (left of fig. 1), whereas if it is strong, polymorphism is possible over a wide  
 124 range (right of fig. 1).

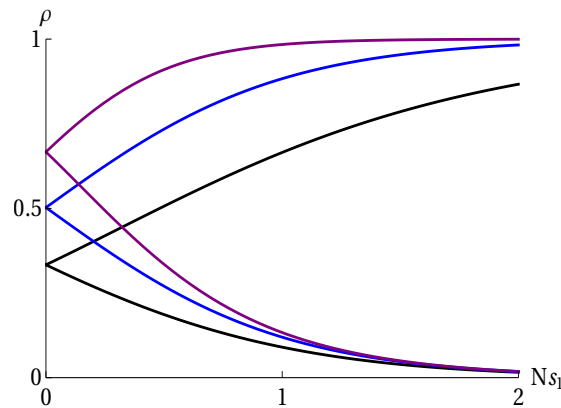

Figure 1: Bounds on the proportions of habitat 1,  $\rho$ , between which polymorphism is possible, as a function of the strength of selection in that habitat,  $Ns_1$ . The three sets of bounds correspond to  $Ns_2/Ns_1 = 0.5, 1, 2$  (black, blue and purple respectively). These results apply in the limit of low migration, and soft selection.

125 Suppose now that there are a finite number of demes, with  $d_i$  having habitat  $i$ . At any one  
 126 locus, the state of the metapopulation is described by the number of demes fixed for the ‘1’  
 127 allele,  $0 \leq k_i \leq d_i$ . For example, with two habitats, there are  $(d_1+1)(d_2+1)$  possible values for the  
 128 state  $\{k_1, k_2\}$ . The probability of transitions between these states depends on the mean allele  
 129 frequency across the metapopulation. With soft selection, where all demes have the same size  
 130  $N$ , this mean is just  $\bar{p} = (k_1 + k_2) / (d_1 + d_2)$ . We can therefore calculate the transition matrix that  
 131 governs the stochastic evolution of the metapopulation; the stationary state is given by the lead-  
 132 ing eigenvector of this matrix. With soft selection, each locus evolves independently, governed  
 133 by this matrix, and so we can easily calculate the stochastic evolution of the metapopulation.

134 In the Appendix, we examine the accuracy of the fixed-state approximation under soft selection.  
 135 This approximation applies in the limit of low migration, and identifies the failure of adaptation  
 136 due to random drift.

## 137 Results

### 138 Evolution of a single deme

139 Suppose in a metapopulation containing two habitats we focus on the rare habitat so that the  
 140 numbers and adaptedness of the whole metapopulation remains constant. Suppose also that the  
 141 adaptive allele is favored in the rare habitat and disfavored in the common habitat with selective  
 142 strength  $s_1$  and  $s_2$  respectively, we can look at how the mean allele frequency (averaged across  
 143 loci) in the rare habitat responds to changes in local conditions such as  $Nm$  or local conditions  
 144 such as changes in the population size or local selection pressure in a single deme ( $Ns$ ) as shown  
 145 below. We see in fig. 2a that with  $Nm$  too low, genetic variation is lost and with  $Nm$  too high,  
 146 the adaptive allele is swamped. There is an intermediate value of  $Nm$  that maximizes the mean  
 147 allele frequency of the adaptive allele in the rare habitat. In fig. 2b, with  $Ns_1$  too small, drift  
 148 overwhelms selection and the adaptive allele is lost from the rare habitat.

149 Consider a metapopulation, where  $Nm$  is small enough that populations are near fixation. If  
 150  $Ns_1=1$  in a rare habitat, represented in  $\rho=0.2$  of the demes, and  $Ns_2=-2$  in the common  
 151 habitat, then polymorphism will be maintained with  $\bar{p}=0.079$  overall (eq. (4)). We begin by  
 152 considering how a single deme responds to changes in its local conditions, for fixed  $\bar{p}$ , and so in  
 153 fact, all that matters is the value of  $\bar{p}$ . In the focal deme, allele frequencies will be in the ratio  
 154  $\bar{q}:\bar{p}e^{2Ns_1}$  when  $Nm \ll 1$ , since that is the ratio of substitution rates in either direction; hence,  
 155 the expected allele frequency in the rare habitat is 0.386 (fig. 2a, left). As  $Nm$  increases, the  
 156 expected allele frequency decreases, approaching  $\bar{p}=0.079$  (fig. 2a, right). For given  $Nm$ , the  
 157 expected allele frequency in the focal deme increases with  $Ns_1$  from  $\bar{p}$  to 1, as selection becomes  
 158 more effective (fig. 2b).

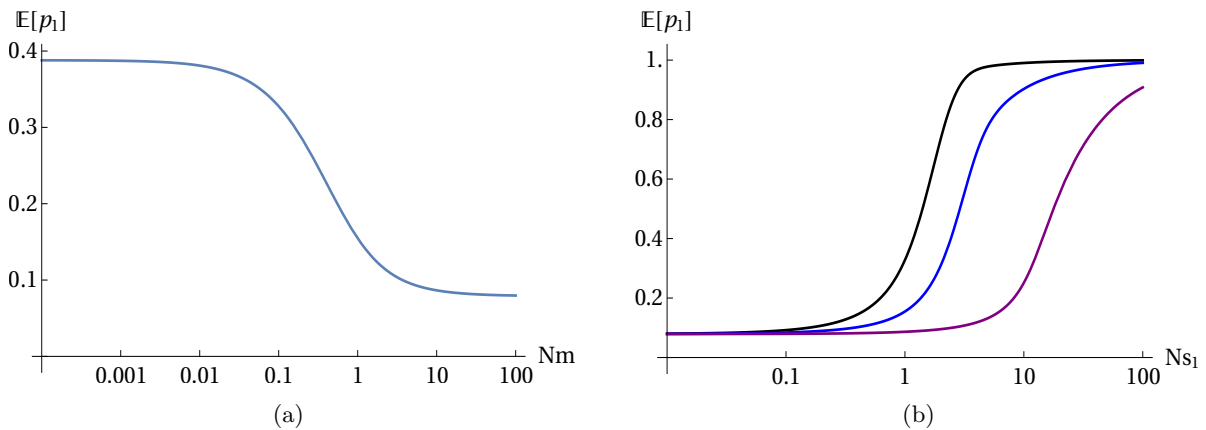

Figure 2: Left: Expected allele frequency vs  $Nm$  with  $\bar{p}=0.079$ ,  $Ns_1=1$ . Right: Expected allele frequency vs.  $Ns$ , for  $Nm=0.1, 1, 10$  (black, blue, purple).

159 Figure 3a shows how the distribution of allele frequencies changes as  $Nm$  changes. If all loci start  
 160 close to the frequency in the gene pool ( $\bar{p}=0.079$ ) then with a low migration rate ( $Nm=0.05$ ),  
 161 even weak selection ( $Ns=1$ ) can raise the mean substantially, to 0.355. However, this increase  
 162 is slow, taking  $\sim 5000$  generations, because it occurs through occasional substitutions, at a rate  
 163 is proportional to  $m=5 \times 10^{-4}$  (eq. (3)). The population does mostly flip between fixation of one  
 164 or other allele, giving a U-shaped frequency distribution (e.g. grey trajectory in fig. 3), and so  
 165 the fixed-state approximation is quite close to the exact mean (orange vs. red at left). However,  
 166 the average across even 100 loci fluctuates substantially (blue), implying that population fitness  
 167 will fluctuate randomly, even when adaptation is highly polygenic.

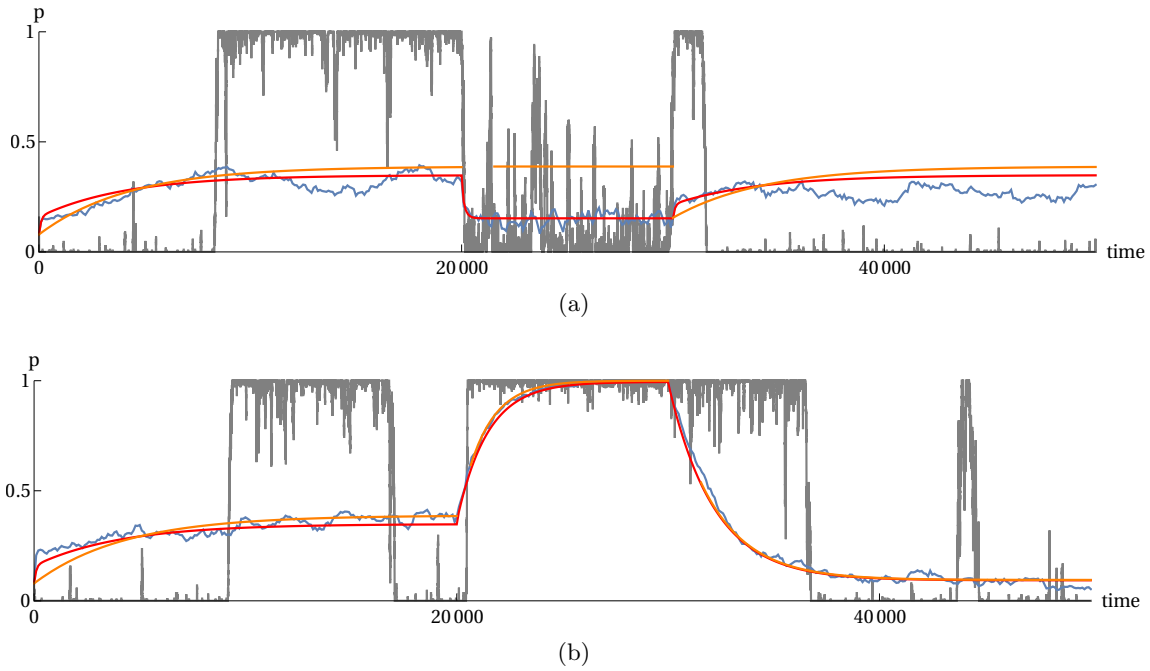

Figure 3: (a) Evolution of a single deme as  $Nm$  changes;  $Ns=1$ ,  $\bar{p}=0.079$ ,  $L=100$  loci. Initially,  $Nm=0.05$ , and all loci are at  $\bar{p}$ . After 20,000 generations,  $Nm$  increases to 1, and after another 10,000 generations, it returns to  $Nm=0.05$ . The grey line shows allele frequency at a single locus, and the blue line shows the average over 100 loci. The red curve is the mean of the probability distribution, calculated exactly using the Wright-Fisher transition matrix. The orange curve is the fixed-state approximation (eq. (3)), which is accurate only for  $Nm \ll 1$ . (b) The same, but for  $Ns$  changing from 1 to 10 at 20,000 generations, and then to 0.1 at 30,000 generations;  $Nm=0.05$  throughout.

168 At 20,000 generations, the number of migrants increases to  $Nm=1$ , and the mean allele fre-  
 169 quency is quickly pulled down towards that in the gene pool, to 0.155. The fixed-state approx-  
 170 imation is the limit of low migration, and so is independent of  $Nm$  (see fig. A1). Indeed, allele  
 171 frequencies are now often intermediate, and so this approximation fails (orange vs. red, fig. 3,  
 172 middle). Nevertheless, it does give the important intuition that rates of change are proportional  
 173 to migration, which is now  $m=0.01$ , implying a  $\sim 100$  generation timescale for response of the  
 174 population mean. In this model, variance is maintained by migration, and so the response to  
 175 selection is proportional to  $m$ . After  $Nm$  returns to the original low value at 30,000 generations,  
 176 there is a slow return to the original bimodal distribution, again captured by the fixed-state  
 177 approximation (orange vs red at right of fig. 3).

178 Figure 3b shows the response to changes in  $Ns$ , which could arise through changes in selection  
 179 strength, and/or changes in effective local population size. In this example,  $Nm=0.05$  through-  
 180 out, and so the fixed-state approximation is accurate (orange vs red curves). The timescale is  
 181 again set by  $m$ , which determines the rate at which variation is introduced into local demes.  
 182 Since  $m=5 \times 10^{-4}$ , it takes thousands of generations for the proportion of loci fixed for the ‘1’  
 183 allele to respond to changes in selection strength.

184 Figure 4 shows the time taken for a population to respond to changes in  $Nm$  (fig. 4a) or  $Ns$   
 185 (fig. 4b), as a function of the other parameter. As we saw in fig. 3a, an increase in  $Nm$  causes  
 186 a much faster response than a decrease, simply because high gene flow introduces more genetic  
 187 variance. However, if selection is very strong, the response time becomes similar in either  
 188 direction, and decreases in proportion to  $Ns$  (right of fig. 4a). The response to changes in  $Ns$   
 189 take somewhat longer for an increase than a decrease (fig. 4b), but the main pattern here is  
 190 that the response time decreases in proportion to  $Nm$ .

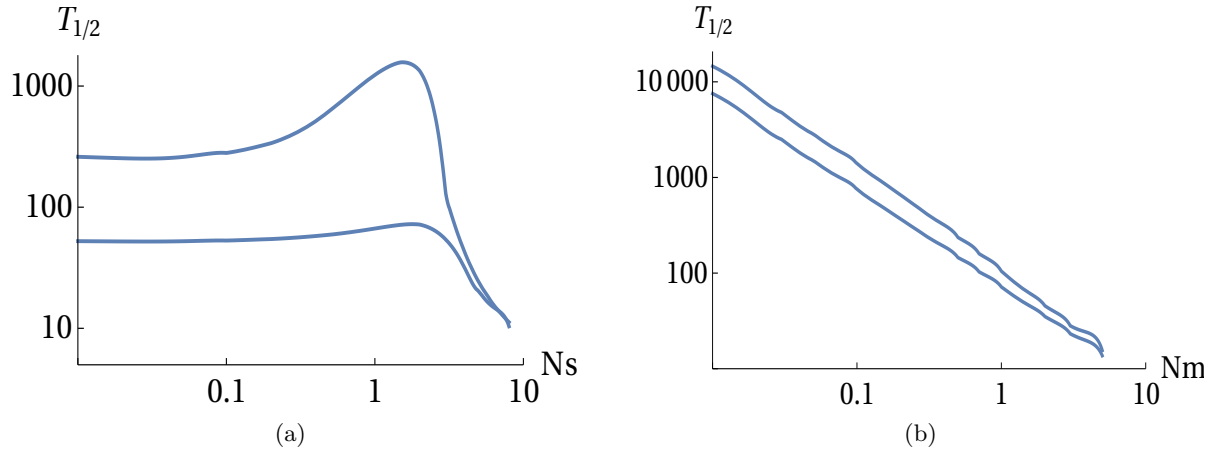

Figure 4: The time to make half of the response to a change in parameters. For both plots,  $\bar{p}=0.079$ . Values were calculated using a transition matrix with  $N=100$ . (a)  $Nm$  shifts from 0.05 to 1 or from 1 to 0.05 (lower, upper curves, resp.), for varying  $Ns$ . (b)  $Ns$  shifts from 0.1 to 1 or from 1 to 0.1 (upper, lower curves, resp.) for varying  $Nm$ .

## 191 Evolution of a metapopulation

192 We begin by considering the stationary state of a metapopulation, extending Szep et al [16]  
 193 by allowing a finite number of demes – in which case, a low rate of mutation is required to  
 194 maintain variation in the long term. We then give an example that shows how variation is lost,  
 195 as loci fixed across the whole metapopulation. Finally, we give examples (analogous to fig. 3),  
 196 showing the response when parameters change across the whole metapopulation.

### 197 Stationary state of a finite metapopulation in the limit of small $Nm$

198 Szep et al (2021, Fig. 2) show that with soft selection, polymorphism can be maintained  
 199 in an infinite metapopulation, provided that selection is sufficiently strong. With symmetric  
 200 selection ( $s_1=s_2$ ), this requires  $Ns > Ns_{crit} = 1/2 \log \left[ \frac{1-\rho}{\rho} \right] + Nm(1-2\rho)$ ; the first term is derived  
 201 from the fixed-state approximation, in the limit  $Nm \ll 1$ , and the second from the deterministic  
 202 model, which requires  $s > m(1-2\rho)$  for polymorphism. In a metapopulation with a finite number  
 203 of demes, variation must ultimately be lost: we must include mutation to allow a non-trivial  
 204 stationary state. In this section, we examine how the outcome depends on the relative rates  
 205 of selection and drift ( $Ns$ ) and on the relative rates of mutation and migration ( $\mu/m$ ). In  
 206 particular, we show that with sufficiently many demes, the outcome is insensitive to the mutation  
 207 rate.

208 Figure 5 shows the stationary state in the limit of small  $Nm$ , derived using the fixed-state  
 209 approximation. The top row of fig. 5 shows how the fraction of demes fixed at equilibrium  
 210 depends on the strength of selection; the focal allele is favoured in 20% of demes (blue), and  
 211 disfavoured twice as strongly in 80% of demes (i.e.  $Ns_2 = -2Ns_1$ ; red). When mutation is  
 212 appreciable ( $\mu/m=0.05$ , fig. 5a), the allele is unlikely to be lost by chance, and so the equilibrium  
 213 is insensitive to the number of demes, and close to the solution for an infinite population: results  
 214 for 50, ..., 400,  $\infty$  demes are superimposed, and almost indistinguishable. When selection is  
 215 strong (right of fig. 5a and 5b), all demes are fixed for the favoured allele, whereas when  
 216 selection is negligible, on average half of the demes are fixed for each allele. (Mutation is  
 217 assumed symmetric). In-between ( $0.1 < Ns < 1$ ), the allele favoured in the rare habitat becomes  
 218 rare, being pulled to low frequency by migration from the commoner habitat, where it is more

219 strongly disfavoured. When mutation is weak relative to migration (as is likely in nature), this  
 220 pattern is exaggerated ( $\mu/m=0.0005$ ; fig. 5b). Above a critical value,  $Ns_{crit} \sim (1/2) \log \left[ \frac{1-\rho}{\rho} \right] \sim$   
 221 0.7, polymorphism can be maintained by divergent selection, despite drift and gene flow. The  
 222 equilibrium for an infinite population (purple) gives an upper bound, but stochastic loss from a  
 223 finite set of demes reduces the expected frequency, and increases the critical  $Ns_{crit}$  (dashed lines  
 224 around  $Ns \sim 1$ , for 50, 100, ... demes). There is a wide region ( $0.03 < Ns < 0.7$ ) where the allele  
 225 is almost absent, being swamped by gene flow. However, for very weak selection, the frequency  
 226 of the allele increases towards the symmetric neutral equilibrium at 0.5. (In this regime, the  
 227 frequencies in the two habitats are almost identical, and cannot be distinguished in the figure).  
 228 In this regime (left of fig. 5a), although selection is negligible within demes ( $Ns < 0.1$ ), migration  
 229 is much faster than mutation, and so selection over the whole metapopulation is effective in  
 230 eliminating the allele that is deleterious in most demes. When  $\mu \ll m$ ,  $Ns < 0.1$  (left of fig. 5a),  
 231 selection is more effective at the level of the whole metapopulation in the habitat which has  
 232 more demes.

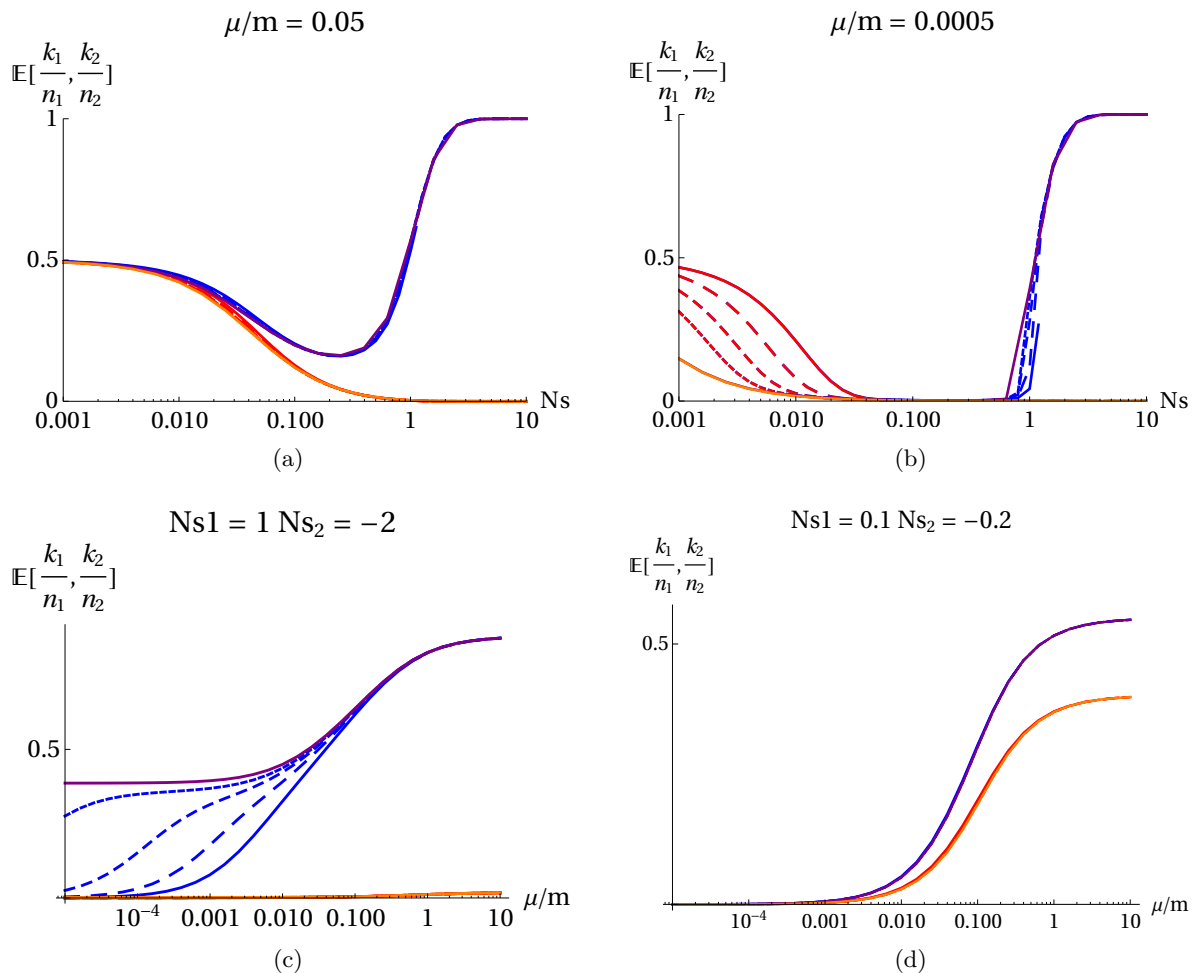

Figure 5: The fraction of demes fixed in the two habitats (blue, red), as a function of selection strength ( $Ns$ , top row) and the rate of mutation, relative to migration ( $\mu/m$ , bottom row). The focal allele is favoured by selection  $Ns_1$  in 20% of demes (blue), and disfavoured by selection  $Ns_2 = -2Ns_1$  in 80% of demes. In each plot, equilibria for 50, 100, 200 and 400 demes are superimposed (solid, dashed, ... dotted lines), together with the limit for an infinite metapopulation (purple, orange).

233 The bottom row of fig. 5 shows the dependence on the relative rates of mutation versus



234 migration,  $\mu/m$ . With high mutation rates, the equilibrium approaches a fraction  $\mathbb{E}[k/n]=$   
235  $1/(1+e^{-2Ns})$ , given by the fixed-state approximation. There is strong divergence when  $Ns_1=1$   
236 (right of fig. 5c), and weaker divergence when selection is weak (fig. 5d,  $Ns_1=0.1$ ). With mod-  
237 erately strong selection (fig. 5c), the allele that is less favoured overall is lost from the common  
238 habitat, independent of the number of demes and mutation rate (orange line). In the rare  
239 habitat, with weak mutation (left of fig. 5c), the locally favoured allele can be fixed in nearly  
240 half the demes in an infinite metapopulation (purple), but tends to be lost by chance from finite  
241 metapopulations, even with several hundred demes (blue). When selection is weak relative to  
242 local deme size (fig. 5d), selection can still be effective over the whole metapopulation, elimi-  
243 nating the allele that is disfavoured overall (left of fig. 5d). However, when mutation becomes  
244 comparable with migration, polymorphism is maintained by mutation pressure, with some bias  
245 between habitats caused by weak selection (right of fig. 5d).

246 We focus on the regime with moderately strong selection, comparable to drift ( $Ns_1 \sim 1$ ), and  
247 weak mutation. This corresponds to the right half of fig. 5b ( $0.1 < Ns_1$ ), and the middle of  
248 fig. 5c ( $10^{-4} < \mu/m < 0.1$ ). Then, as long as mutation is not extremely small, and there are  
249 enough demes, the stationary state is close to that in an infinite metapopulation (compare blue  
250 dashed with purple lines in fig. 5c). However, note that with weak mutation ( $\mu/m \sim 10^{-4} - 10^{-3}$ ,  
251 say), the locally favoured allele tends to be lost even when there are several hundred demes.

## 252 **Loss of diversity in a finite metapopulation**

253 When deme sizes are fixed, and numbers of migrants are low enough that loci are typically fixed  
254 for one or other allele, the state of the metapopulation at each locus can be described by the  
255 number of demes,  $k_i$ , in each habitat,  $i$ , that are fixed for the ‘1’ allele. The distribution of  $k_i$   
256 evolves according to a transition matrix, and each locus follows an independent realisation of the  
257 same stochastic process. Figure 6 compares the dynamics of this fixed-state approximation with  
258 simulations, to illustrate the accuracy of the fixed-state approximation. For the low migration  
259 rate  $Nm=0.05$  assumed here, there is reasonable agreement; with  $Nm=0.01$ , agreement is very  
260 close (fig. A2). Variation is lost faster than predicted by the fixed-state approximation, because  
261 migration tends to swamp adaptive divergence. The timescale is inversely proportional to  $m$ ,  
262 and is therefore slow. Here, we are focussing on the slow loss of adaptation through random  
263 drift in small populations; with higher migration rates, swamping by gene flow causes additional,  
264 faster, degradation.

265 Note that because the number of demes is limited, and because each deme flips between fixation  
266 for alternative alleles, there is substantial variability in average allele frequency between loci  
267 (grey lines). Therefore, adaptation is lost slightly faster in a finite than in an infinite metapop-  
268 ulation (compare black and magenta lines in fig. 6, which both derive from the fixed-state  
269 approximation). Nevertheless, the overall mean, averaged over 40 loci, changes smoothly and  
270 predictably (red curves in fig. 6). We assume no mutation, and so all variation will inevitably be  
271 lost. However, because the total population is large ( $100 \times 50 = 5000$  individuals), and because  
272 the very low migration rate increases the effective size of the whole metapopulation, loss across  
273 the whole metapopulation is extremely slow: none of the 40 loci fix during the  $10^4$  generations  
274 shown here.

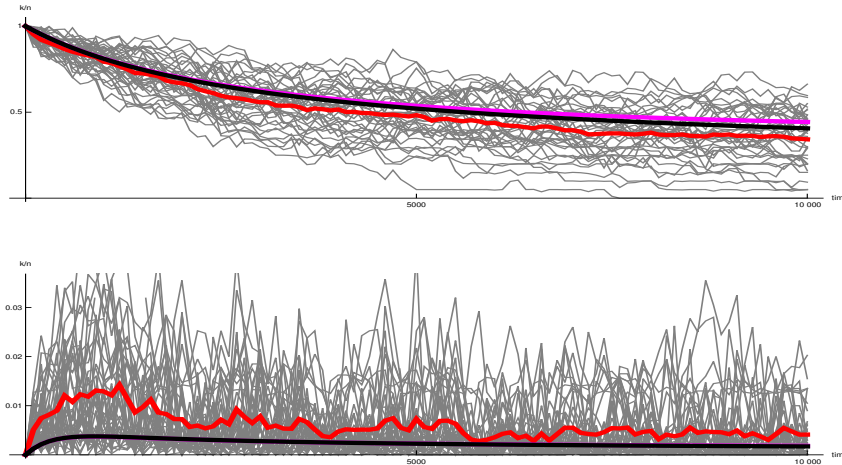

Figure 6: Loss of diversity in a metapopulation of 100 demes, which is initially perfectly adapted. Mean allele frequency is plotted against time, in the 20 demes where the focal allele is favoured (top), and the 80 demes where it is not (bottom). Thin grey lines show allele frequencies at 40 loci, averaged over demes; the red line shows the overall mean. The black curve shows the fixed-state approximation, for a finite metapopulation, and the magenta line, for an infinite metapopulation. Simulations are for  $N = 50$ ,  $Nm = 0.05$ ,  $s_{1,2} = \{0.02, -0.04\}$ ; thus,  $Ns_{1,2} = \{1, -2\}$ , so that selection and drift are of similar magnitude.

## 275 Response to changing conditions across the metapopulation

276 Figure 7 shows some examples of the response to a change in conditions across the whole  
277 metapopulation. We use the same baseline case as above, with the rarer habitat in  $\rho=0.2$   
278 of the demes. We consider global changes across the whole metapopulation; however, for the  
279 parameters we consider, the allele favoured in the rare habitat is always rare in the common  
280 habitat, and so results would be essentially the same if parameters changed only in the rarer  
281 habitat.

282 Figure 7a shows the consequences of a change in  $Nm$  from 0.05, to 1, and then back to 0.05, as in  
283 fig. 3a. Initially, conditions are the same as in fig. 6, except that we start with a fraction of demes  
284 fixed for the locally favoured allele, in the proportions predicted for an infinite metapopulation.  
285 This allele gradually declines, somewhat faster than predicted in the limit of small  $Nm$  (compare  
286 red vs black lines at left). After  $10^4$  generations,  $Nm$  increases to 1, and the rarer allele is rapidly  
287 swamped, over a timescale of  $\sim 1/m=50$  generations. After 500 generations, variation persists  
288 at only 6 of the 40 loci, so that when  $Nm$  then decreases back to its original level, only those  
289 loci can recover. The dynamics at the remaining polymorphic loci are the same as before, with  
290 recovery over  $\sim 1/m=1000$  generations, but there has been a drastic loss of variation during the  
291 brief period of swamping. This contrasts with fig. 3a, where variation could be restored at all  
292 loci, because only one deme had been swamped.

293 Figure 7b shows the response to changes in  $Ns$ , with  $Nm=0.05$  throughout. The initial  $10^4$   
294 generations have the same parameters as in fig. 7a, and so again, diversity is gradually lost,  
295 somewhat faster than predicted in the limit  $Nm \rightarrow 0$ . After  $10^4$  generations, selection increases  
296 by a factor 10, and all loci quickly shift to near-perfect adaptation. Despite the strong selec-  
297 tion, there is still considerable variation in the rates of increase across loci, though the overall  
298 equilibrium is approached quite smoothly (red curve,  $10^4 - 1.5 \times 10^4$  generations). After 15,000  
299 generations, selection weakens by a factor 100, to near-neutrality, and the rarer allele is lost. In  
300 the two later stages, the dynamics are closely predicted by the small  $Nm$  limit (black curves),

301 which is based simply on the rates of substitutions in either direction.

302 Figure 7c shows a similar scenario, but with strong migration,  $Nm=1$ , which couples evolution  
303 in the different demes. We double the initial selection strength (i.e.,  $Ns_1=2$ ,  $Ns_2=-4$ ), to  
304 ensure that polymorphism is maintained, despite high  $Nm$ . Mean allele frequencies fluctuate  
305 around the deterministic equilibrium, but there is sufficient drift that, occasionally, the allele is  
306 lost from all the demes (grey lines). Thus, after  $10^4$  generations, only 11 of the 40 loci are still  
307 polymorphic. Selection then strengthens ten-fold, and these polymorphic loci rapidly approach  
308 fixation, over a timescale of just a few generations ( $\sim 1/s=2.5$ ). However, because only 11/40  
309 loci remain polymorphic, the overall mean is  $\sim 0.25$  (red, middle). After 5,000 generations,  
310 selection returns to its initial value; as before, loci fluctuate around a metastable equilibrium,  
311 but occasionally fix. Thus, after 20,000 generations, only one locus remains polymorphic.

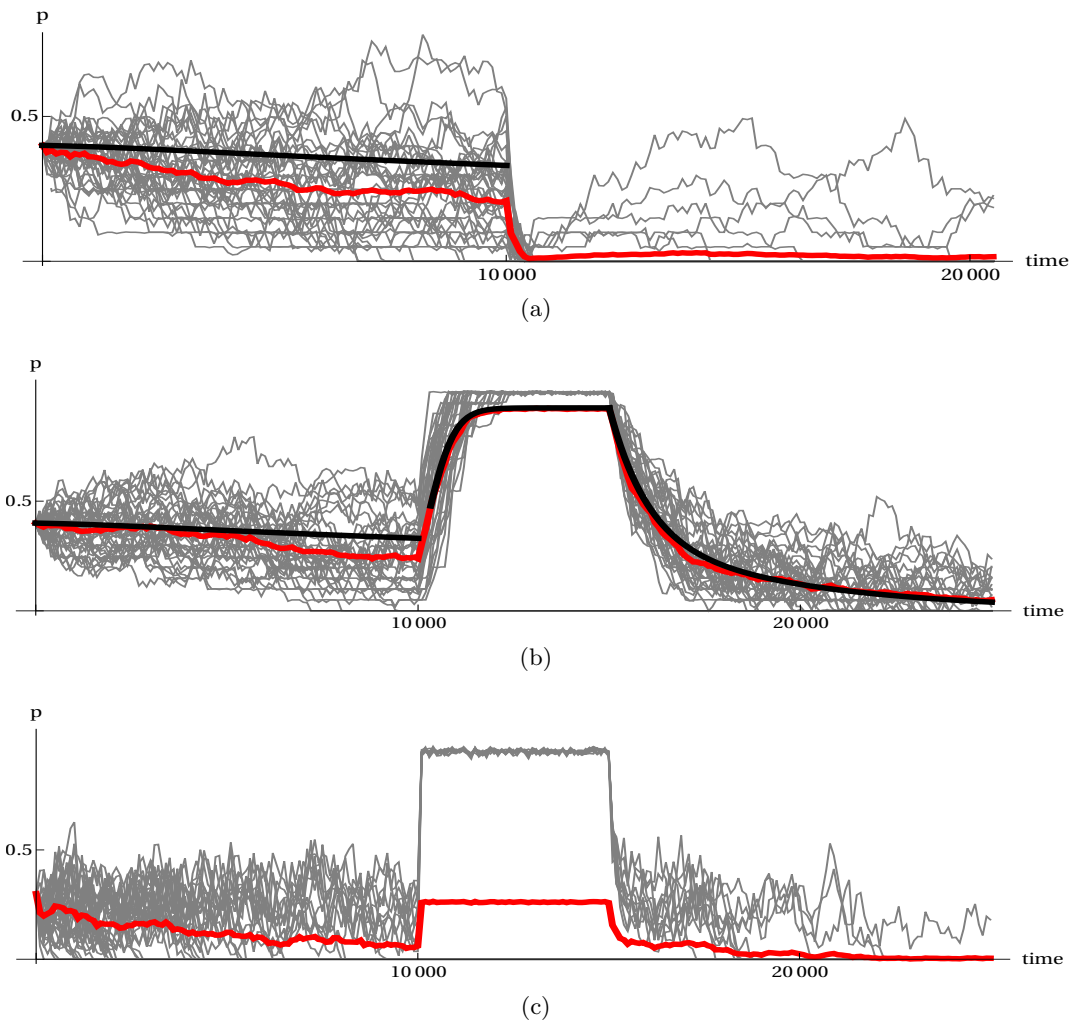

Figure 7: Response of a metapopulation to changing conditions. Grey lines show the allele frequencies, averaged over the 20 demes in the rare habitat, at each of 40 loci; the red line shows the overall mean in the rare habitat. The black line shows the prediction in the limit of small  $Nm$ . (a) Changing  $Nm$ , with  $Ns_1=1$ ,  $Ns_2=-2$ . Initially,  $Nm=0.05$ ; it increases to 1 after 10000 generations, and after a further 500 generations, returns to its initial value. (b) Changing  $Ns$ , with  $Nm=0.05$ . Initially,  $Ns_1=1$ ,  $Ns_2=-2$ ; after  $10^4$  generations, selection increases by a factor 10, and after a further 5000 generations, it decreases by a factor 100, to  $Ns_1=0.1$ ,  $Ns_2=-0.2$ . (c) Changing  $Ns$ , with  $Nm=1$ . Initially,  $Ns_1=2$ ,  $Ns_2=-4$ ; after  $10^4$  generations, selection increases by a factor 10, and after a further 5000 generations, it decreases to the initial value,  $Ns_1=2$ ,  $Ns_2=-4$ . As in fig. 6, simulations are for 100 demes of  $N=50$ , with 20 occupying one habitat, and 80 another.

312 If we compare the first  $10^4$  generations in fig. 7b and 7c, we see two effects of migration.  
313 Increasing migration from  $Nm=0.05$  to  $Nm=1$  somewhat reduces the mean allele frequency,  
314 because migration is now comparable to selection, and swamps local adaptation. It also couples  
315 together the allele frequencies in different demes, which makes it more likely that the allele is  
316 lost by chance from all the demes. These two effects increase the rate of stochastic loss, but the  
317 stronger selection in fig. 7c counters this loss. fig. A3 compares these distributions.

## 318 Discussion

319 Our analysis uses simulation, the diffusion approximation and the “fixed-state” approximation  
320 to understand how a finite metapopulation changes through time, as it responds to changes  
321 in both local and global conditions. The “fixed state” approximation applies either where  
322 variation is due to mutation (when it is plausible that  $N\mu < 1$  within local demes, or even for  
323 the whole populations), or when variation is maintained by divergent selection across the whole  
324 metapopulation, but migration is low relative to drift  $Nm < 1$ .

325 When selection is weaker than drift (i.e.  $Ns \ll 1$ ), polymorphism can only be maintained for  
326 a very narrow range of habitat proportions (fig. 1). However with strong selection, this range  
327 becomes much wider. When conditions in a single deme of the metapopulation change, the  
328 population responds on a short time scale of order  $1/m$ , simply because in the regime we  
329 study, local genetic variance is maintained by migration. Variation may be temporarily lost  
330 as local conditions change, but can quickly be recovered. On the other hand, when conditions  
331 change across the metapopulation, variation that was maintained by divergent selection can be  
332 permanently lost, and is only slowly recovered by mutation. Even under constant conditions,  
333 variation at a locus can be lost by chance, unless there are a very large number of demes.

334 To simplify our analysis, we assumed an island model, with a large number of spatially equivalent  
335 demes. This is unlikely to be the case in nature, but may nevertheless capture the behaviour  
336 of spatially extended populations if there is long-range migration, which can introduce locally  
337 adaptive alleles from a distant habitat. It may be that a leptokurtic dispersal distribution can  
338 allow efficient adaptation, if locally favoured alleles are not swamped, and yet can be recovered  
339 by occasional long-range migration [1, 10].

340 Our analysis can be further extended to hard selection, by including explicit density regulation;  
341 Szep et al [16] show that one can still apply the diffusion approximation, provided that growth  
342 rates are not too high. With hard selection, substitution rates depend on deme size through  
343  $Ns$ , and through the number of immigrant alleles,  $m\bar{Np}$ ,  $m\bar{Nq}$ . This dependence can be ap-  
344 proximated by assuming that the population size is determined by the genetic load. Sachdeva  
345 et al [15] and Szep et al [16] refer to this as the “semi-deterministic” approximation which  
346 is accurate when demographic stochasticity is weak. One can apply the “fixed-state” approx-  
347 imation by further assuming that there are enough loci that the mean load is proportional to  
348 the mean across loci of the number of demes fixed for one or the other allele. The transition  
349 matrix can then be calculated as before, but is now a function of the population sizes in the two  
350 habitats,  $\{N_1, N_2\}$  which both depend on the current state via the load. The key assumption  
351 here is that with enough loci, the population sizes change almost deterministically, following  
352 the distribution of states across loci. One complication with hard selection is the existence of  
353 multiple stable equilibria: changing conditions would not just cause equilibria to shift but also  
354 changes the rates of transitions between equilibria.

355 A key assumption in our analysis is that selection is directional: in a given environment, alleles  
356 experience a fixed selection pressure, which tends to drive out variation. More often, selection

357 may favour an intermediate optimum for a quantitative trait, such that when the mean is well-  
358 adapted, alleles are close to neutral. Our modelling framework can describe this case, but it is  
359 much more complex, since many different allele combinations can achieve the same optimum.  
360 However, if selection on each allele is weak ( $Ns < 1$ ), then the infinitesimal model [3] applies,  
361 and can also describe the population dynamics [4]. Local adaptation may be possible under  
362 higher migration rates in such a regime.

363 In this work, we have introduced a novel approach to understanding the dynamical evolution of  
364 metapopulations. Although the full behaviour requires simulation, the diffusion approximation  
365 allows the stationary state to be calculated, and identifies the key dimensionless parameters.  
366 Moreover, when migration is rare, we can use a fixed state approximation that connects popu-  
367 lation genetics with models of adaptive walks [12].

## 368 Funding

369 This research was partly funded by the Austrian Science Fund (FWF) [FWF P-32896B].

## 370 References

- 371 [1] Atkinson, R. P. D., Rhodes, C.J, Macdonald, D.W., Anderson, R.M.. “Scale-Free Dynamics  
372 in the Movement Patterns of Jackals.” *Oikos*, vol. 98, no. 1, July 2002, pp. 134–40. DOI.org  
373 (Crossref), <https://doi.org/10.1034/j.1600-0706.2002.980114.x>.
- 374 [2] Barton, N. H., and Rouhani, S. “Adaptation and the ‘Shifting Balance.’” *Ge-  
375 netical Research*, vol. 61, no. 1, Feb. 1993, pp. 57–74. DOI.org (Crossref),  
376 <https://doi.org/10.1017/S0016672300031098>.
- 377 [3] Barton, N.H., Etheridge, A.M., Veber, A . “The Infinitesimal Model: Definition, Derivation,  
378 and Implications.” *Theoretical Population Biology*, vol. 118, Dec. 2017, pp. 50–73. DOI.org  
379 (Crossref), <https://doi.org/10.1016/j.tpb.2017.06.001>.
- 380 [4] Barton, N.H., and Etheridge, A.M. “Establishment in a New Habitat by Polygenic Adapta-  
381 tion.” *Theoretical Population Biology*, vol. 122, July 2018, pp. 110–27. DOI.org (Crossref),  
382 <https://doi.org/10.1016/j.tpb.2017.11.007>.
- 383 [5] Bell, G., and A. Gonzalez. “Adaptation and Evolutionary Rescue in Metapopulations Expe-  
384 riencing Environmental Deterioration.” *Science*, vol. 332, no. 6035, June 2011, pp. 1327–30.  
385 DOI.org (Crossref), <https://doi.org/10.1126/science.1203105>.
- 386 [6] Bell, G., ”Evolutionary rescue.” *Annual Review of Ecology, Evolution, and Systematics*,  
387 vol 48, Nov 2017, pp. 605-627.
- 388 [7] Bialozyt, R., Ziegenhagen, B., Petit, R. “Contrasting Effects of Long Distance Seed Dis-  
389 persal on Genetic Diversity during Range Expansion.” *Journal of Evolutionary Biology*,  
390 vol. 19, no. 1, Jan. 2006, pp. 12–20. DOI.org (Crossref), <https://doi.org/10.1111/j.1420-9101.2005.00995.x>.
- 391
- 392 [8] Breed, M.F., Ottewell, K.M, Gardner, M.G., Lowe, A.J. “Clarifying Climate Change Adap-  
393 tation Responses for Scattered Trees in Modified Landscapes: Adaptation and Scattered  
394 Trees.” *Journal of Applied Ecology*, vol. 48, no. 3, June 2011, pp. 637–41. DOI.org (Cross-  
395 ref), <https://doi.org/10.1111/j.1365-2664.2011.01969.x>.

- 396 [9] Case, T.J., and Taper M.L. “Interspecific Competition, Environmental Gradients, Gene  
397 Flow, and the Coevolution of Species’ Borders.” *The American Naturalist*, vol. 155, no. 5,  
398 May 2000, pp. 583–605. DOI.org (Crossref), <https://doi.org/10.1086/303351>.
- 399 [10] Fric, Z., and Martin K. “Dispersal Kernels of Butterflies: Power-Law Functions Are In-  
400 variant to Marking Frequency.” *Basic and Applied Ecology*, vol. 8, no. 4, July 2007, pp.  
401 377–86. DOI.org (Crossref), <https://doi.org/10.1016/j.baae.2006.06.005>.
- 402 [11] Kirkpatrick, M., and Barton, N.H. “Evolution of a Species’ Range.” *The Amer-  
403 ican Naturalist*, vol. 150, no. 1, July 1997, pp. 1–23. DOI.org (Crossref),  
404 <https://doi.org/10.1086/286054>.
- 405 [12] Orr, H. A. “The Population Genetics of Adaptation: The Distribution of Factors Fixed dur-  
406 ing Adaptive Evolution.” *Evolution*, vol. 52, no. 4, Aug. 1998, p. 935. DOI.org (Crossref),  
407 <https://doi.org/10.2307/2411226>.
- 408 [13] Paulose, J., and Oskar, H. “The Impact of Long-Range Dispersal on Gene Surfing.” *Pro-  
409 ceedings of the National Academy of Sciences*, vol. 117, no. 14, Apr. 2020, pp. 7584–93.  
410 DOI.org (Crossref), <https://doi.org/10.1073/pnas.1919485117>.
- 411 [14] Polechová, J. “Is the Sky the Limit? On the Expansion Threshold of a Species’ Range.”  
412 *PLOS Biology*, edited by Pedro Jordano, vol. 16, no. 6, June 2018, p. e2005372. DOI.org  
413 (Crossref), <https://doi.org/10.1371/journal.pbio.2005372>.
- 414 [15] Sachdeva, H., Olusanya, O., Barton, N.H. 2021. Genetic load and extinction in peripheral  
415 populations: the roles of migration, drift and demographic stochasticity. *Phil. Trans. Roy.  
416 Soc. B* (subm.)
- 417 [16] Szép, E., Sachdeva, H., Barton, N.H. “Polygenic Local Adaptation in Metapopulations:  
418 A Stochastic Eco-evolutionary Model.” *Evolution*, vol. 75, no. 5, May 2021, pp. 1030–45.  
419 DOI.org (Crossref), <https://doi.org/10.1111/evo.14210>.
- 420 [17] Trubenová, B., Krejca, M.S., Lehre, P.K., Kötzing, T. “Surfing on the Seascape: Adap-  
421 tation in a Changing Environment.” *Evolution*, vol. 73, no. 7, July 2019, pp. 1356–74.  
422 DOI.org (Crossref), <https://doi.org/10.1111/evo.13784>.
- 423 [18] Uecker, H., Otto, S.P, Hermisson, J. “Evolutionary Rescue in Structured Populations.”  
424 *The American Naturalist*, vol. 183, no. 1, Jan. 2014, pp. E17–35. DOI.org (Crossref),  
425 <https://doi.org/10.1086/673914>.
- 426 [19] Wright, S. “The Distribution of Gene Frequencies in Populations.” *Genetics*, vol. 23, no.  
427 6, June 1937, pp. 307–20. DOI.org (Crossref), <https://doi.org/10.1073/pnas.23.6.307>.
- 428 [20] Wright, S. “The Distribution of Gene Frequencies in Populations.” *Sci-  
429 ence*, vol. 85, no. 2212, May 1937, pp. 504–04. DOI.org (Crossref),  
430 <https://doi.org/10.1126/science.85.2212.504>.

## 431 Appendix

### 432 Accuracy of the fixed-state approximation

433 Here, we compare the the mean allele frequency in an infinite metapopulation under the diffusion  
434 approximation with the fixed-state approximation for different  $Nm$  values. As expected, the  
435 accuracy of the fixed state approximation holds only for small  $Nm$ .

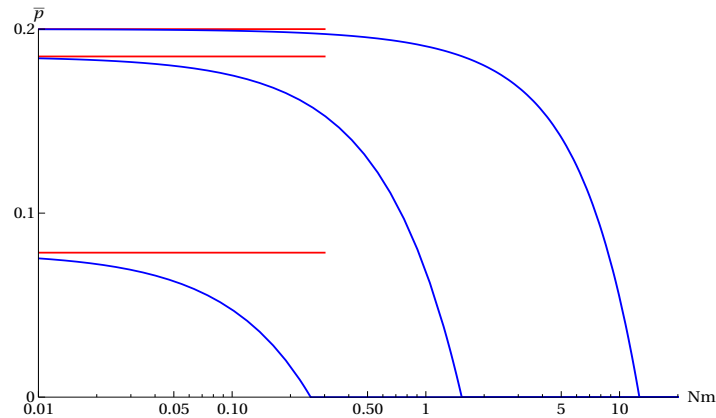

Figure A1: The mean allele frequency in an infinite metapopulation, plotted against  $Nm$ ;  $\rho = 0.2$ ,  $N_{s1}$ ,  $N_{s2} = 1, -2$  (lower curve)  $2, -4$  (middle curve) or  $10, -20$  (upper curve). The fixed-state approximation, which applies for small  $Nm$ , is shown by the red lines.

### 436 Loss of diversity from a finite population, with $Nm=0.01$

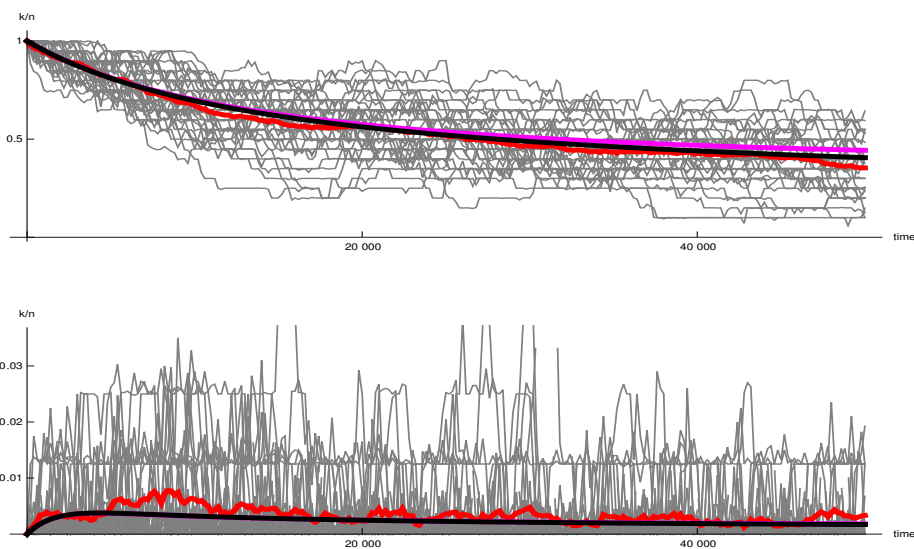

Figure A2: This is identical to fig. 6, except that  $Nm=0.01$ , and the timescale is correspondingly longer. The fixed-state approximation is more accurate with a lower number of migrants.

437 **Distribution of mean allele frequency**

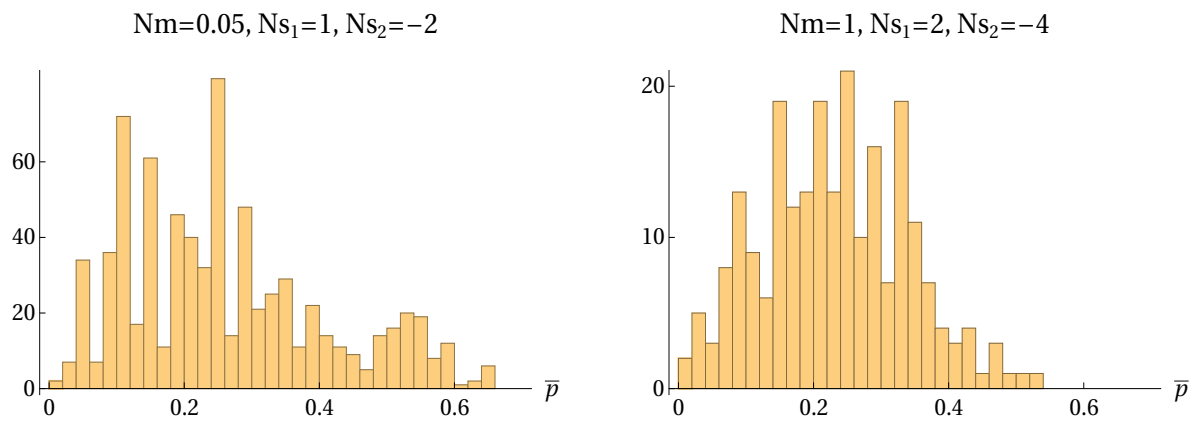

Figure A3: The distribution of allele frequencies, averaged over the 20 demes in the rare habitat, conditional on polymorphism, and accumulated over generations 8,000, 8,100, to 10,000; taken from the simulations in fig. 7b, 7c.
